# Supplementary material for: Investigation of pH-responsive block glycopolymers with different structures for the delivery of doxorubicin
Source: Royal Society of Chemistry journal article supplement (doi:10.1039/c8ra09475f), 2019-01-01
Supplement: c8ra09475f1.pdf [file c8ra09475f1.pdf]

1

## Supporting Information

2

### 3 **Investigation of pH-responsive block glycopolymers with different structures** 4 **for delivery of doxorubicin**

5 Ibrahim Abdalla,<sup>ac</sup> Jiaming Xu,<sup>a</sup> Danyue Wang,<sup>a</sup> Han Tong,<sup>a</sup> Bin Sun,<sup>a</sup> Bin Ding,<sup>bc</sup> Xiaoze  
6 Jiang<sup>\*a</sup> and Meifang Zhu<sup>a</sup>

7 <sup>a</sup> State Key Laboratory for Modification of Chemical Fibers and Polymer Materials, College of  
8 Materials Science and Engineering, Donghua University, Shanghai 201620, China.

9 <sup>b</sup> Key Laboratory of Textile Science and Technology, Ministry of Education, College of Textiles,  
10 Donghua University, Shanghai 201620, China.

11 <sup>c</sup> Innovation Center for Textile Science and Technology, Donghua University, Shanghai 200051,  
12 China.

13 \*Corresponding author: [xiaozejiang@dhu.edu.cn](mailto:xiaozejiang@dhu.edu.cn) (Dr. X. Jiang)

14

15

16

17

18

19

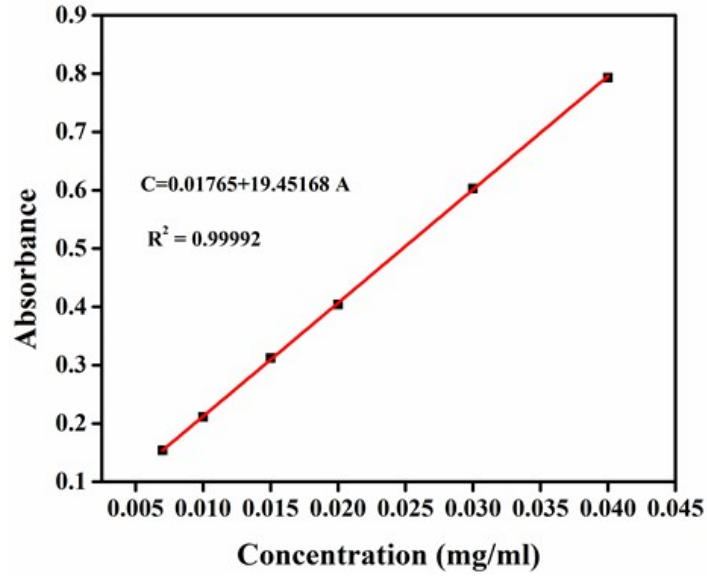

1

2 **Fig. S1** Loading calibration curve in water of DOX.

3

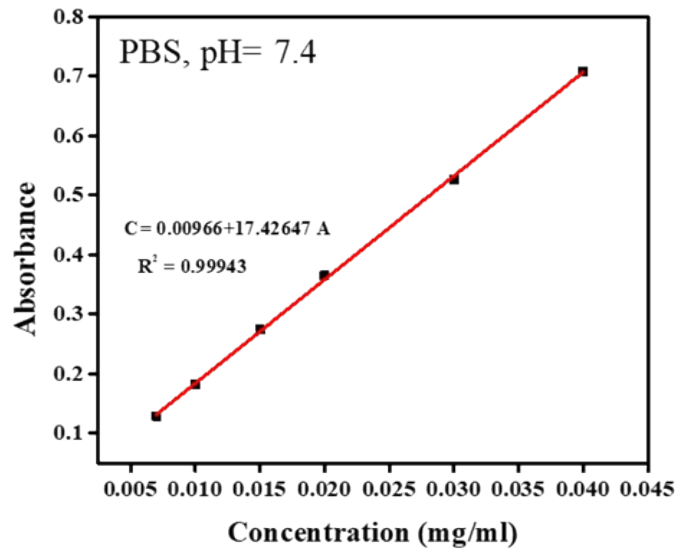

4

5 **Fig. S2** Release calibration curve in PBS media pH 7.4 of DOX.

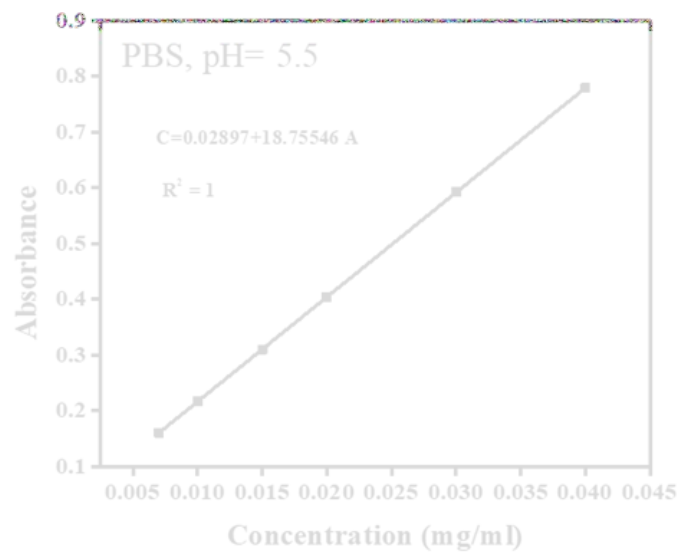

1

2 **Fig. S3** Release calibration curve in PBS media pH 5.5 of DOX.
